# Supplementary figures and images for: Diagnostic Accuracy of a Portable Electromyography and Electrocardiography Device to Measure Sleep Bruxism in a Sleep Apnea Population: A Comparative Study
Source: Preprints.org preprint supplement (doi:10.20944/preprints202307.0141.v3), 2023-11-14

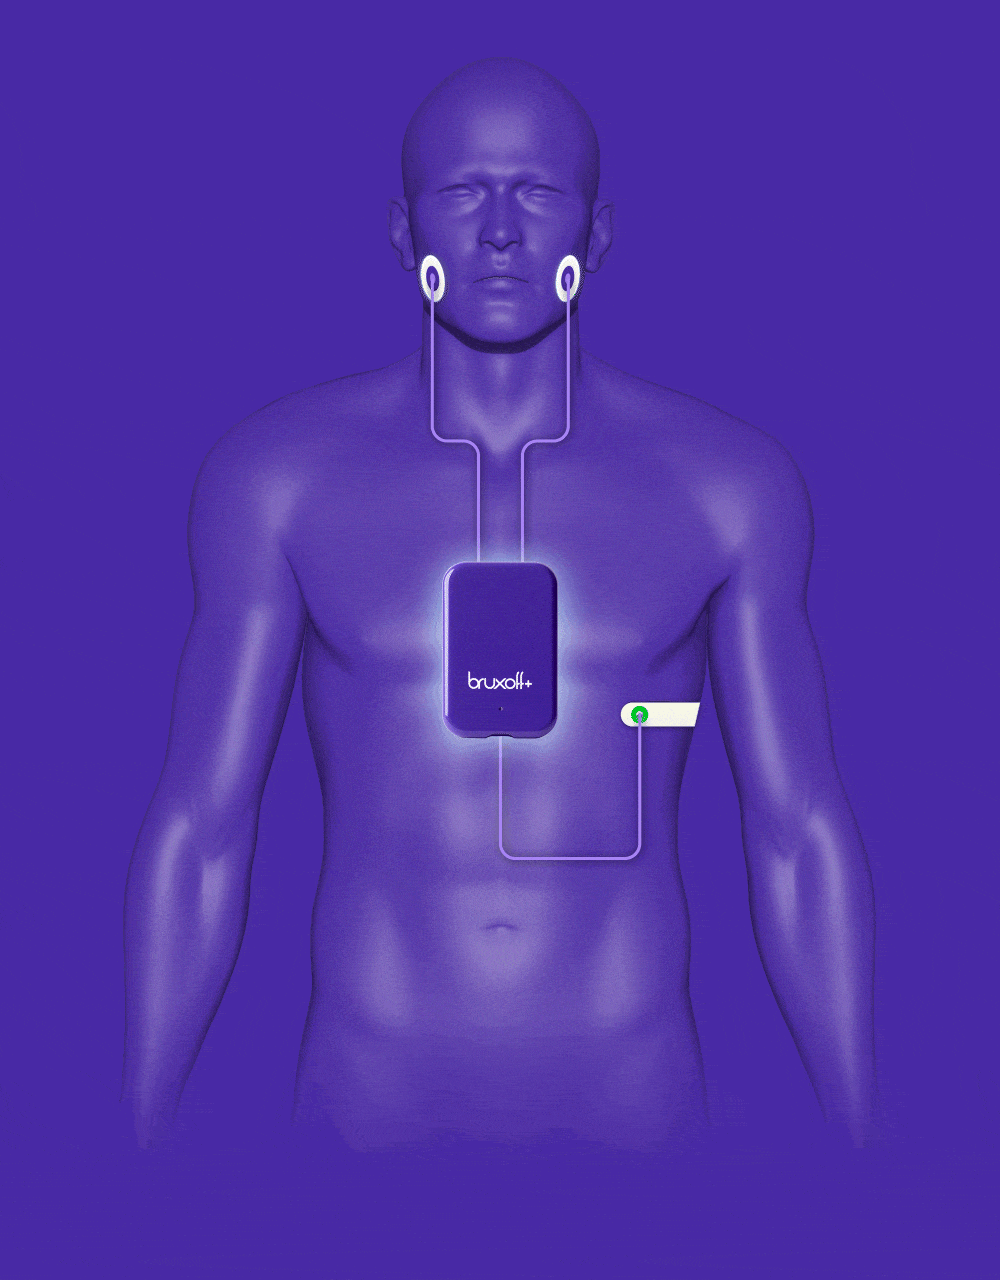


Figure S1. EMG-EKG Device (Bruxoff).

Supplement: Supplementary file 3 [file supplementary]
